# Supplementary material
Source: PubMed Central journal article supplement (PMC4115648)
Supplement: NIHMS605757-supplement-Supplementary.pdf [file NIHMS605757-supplement-Supplementary.pdf]

1 Electronic Supplementary Material (ESM):

2 **Manganese (III) porphyrins complexed with P22 virus-like particles as T<sub>1</sub>-enhanced**  
3 **contrast agents for magnetic resonance imaging (MRI)**

4 *Shefah Qazi,<sup>†,§</sup> Masaki Uchida,<sup>†,§</sup> Robert Usselman<sup>ε</sup>, and Trevor Douglas<sup>†,§,✉</sup>*

5 <sup>†</sup>Chemistry and Biochemistry Department, Montana State University, Bozeman, Montana,  
6 59717, USA

7 <sup>§</sup>Center for Bio-Inspired Nanomaterials, Montana State University, Bozeman, Montana, 59717,  
8 USA

9 <sup>ε</sup>National Institute of Standards and Technology, Boulder, Colorado, 80303, USA

10

11 The additional figures provide supplementary data for further reference to accompany the  
12 manuscript.

13

14

15

16

17

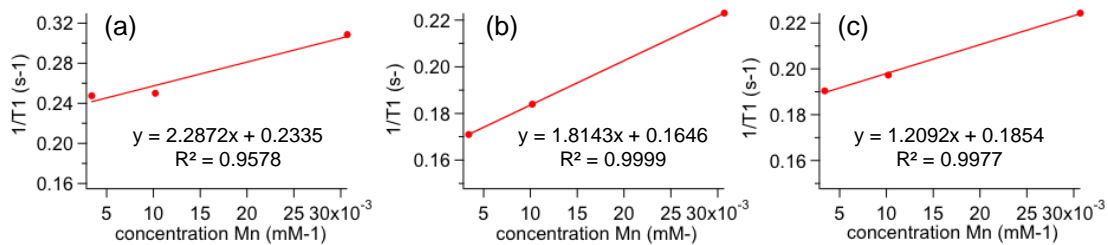

**Figure S1:** NMR  $T_1$ -measurements for P22-xAEMA-MnPP (1,200 MnPP/capsid) at 19 MHz (a), 90 MHz (b), and 300 MHz (c) showing  $R^2$  value close to 1 indicating a good fit, with slope equal to ionic relaxivity.

1

2

3

4

5

6

7

8

9

**Table S1. P22-VLPs conjugated to MnPP with calculated concentrations of MnPP inside P22 and  $r_2 / r_1$  ratio based on different loading factors.**

| MnPP/capsid  | Conc. MnPP inside capsid (mM) | $r_{2,ionic} / r_{1,ionic}$ |
|--------------|-------------------------------|-----------------------------|
| <b>90</b>    | 1.09                          | 17.09                       |
| <b>121</b>   | 1.46                          | 9.91                        |
| <b>155</b>   | 1.88                          | 4.94                        |
| <b>437</b>   | 5.29                          | 3.65                        |
| <b>719</b>   | 8.70                          | 2.48                        |
| <b>778</b>   | 9.42                          | 2.51                        |
| <b>1,072</b> | 13.0                          | 2.18                        |
| <b>1,201</b> | 14.5                          | 1.75                        |
| <b>2,578</b> | 31.2                          | 1.54                        |
| <b>3,236</b> | 39.2                          | 1.48                        |
| <b>3,646</b> | 44.1                          | 1.32                        |

Green = P22-MnPP w/o EDC, Pink = P22-xAEMA-MnPP w/o EDC, Orange = P22-MnPP w/EDC,

White = P22-xAEMA-MnPP w/EDC

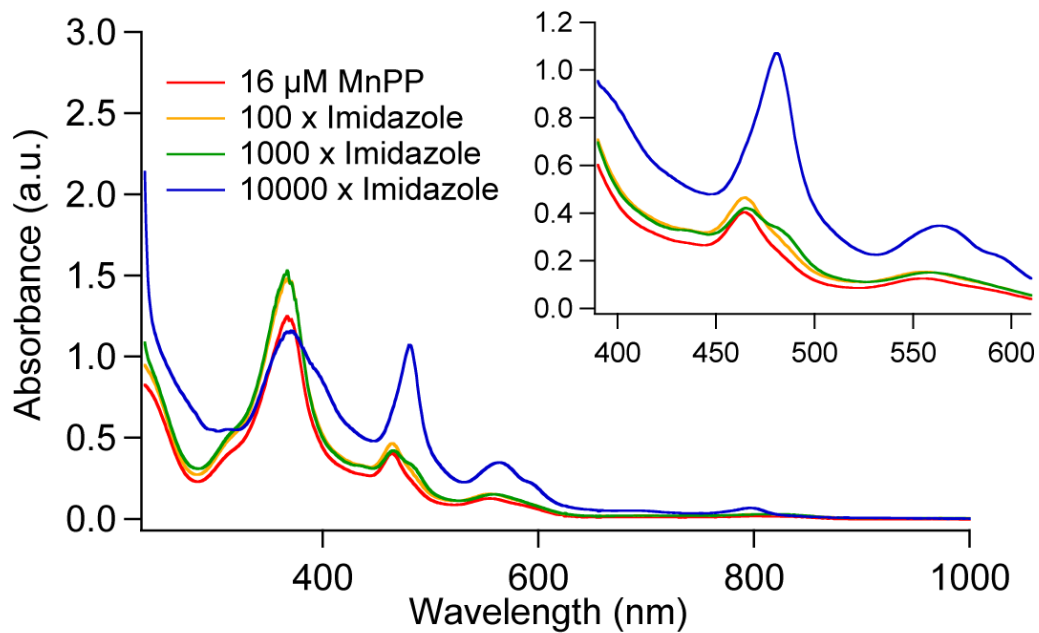

**Figure S2:** UV-VIS spectrum of imidazole added to free MnPP (**red**) at molar excess 100 (**orange**), 1000 (**green**), and 10000 (**blue**) excess. **Inset:** The appearance of the peak at 482 nm indicates binding of imidazole to MnPP.

1

2
